# Supplementary material for: SPIM workflow manager for HPC
Source: Oxford University Press journal article supplement (doi:10.1093/bioinformatics/btz140), 2019-02-22
Supplement: bioinformatics_35_19_3875_s2.zip [file bioinformatics_35_19_3875_s2.zip]

| SPIM Workflow Manager for HPC |            |                               |                               |                               |      |
|-------------------------------|------------|-------------------------------|-------------------------------|-------------------------------|------|
| Job ID                        | Status     | Creation time                 | Start time                    | End time                      |      |
| 234                           | Finished   | Fri Feb 16 15:44:12 CET 2018  | Fri Feb 16 15:54:01 CET 2018  | Fri Feb 16 16:12:45 CET 2018  |      |
| 310                           | Finished   | Wed Jun 13 13:13:38 CEST 2018 | Wed Jun 13 13:15:20 CEST 2018 | Wed Jun 13 13:41:02 CEST 2018 |      |
| 312                           | Finished   | Wed Jun 13 13:46:14 CEST 2018 | Wed Jun 13 13:49:43 CEST 2018 | Wed Jun 13 15:02:10 CEST 2018 |      |
| 321                           | Finished   | Thu Jun 14 10:26:31 CEST 2018 | Thu Jun 14 10:45:44 CEST 2018 | Thu Jun 14 11:48:48 CEST 2018 |      |
| 322                           | Finished   | Thu Jun 14 13:08:48 CEST 2018 | Thu Jun 14 13:13:35 CEST 2018 | Thu Jun 14 14:12:15 CEST 2018 |      |
| 450                           | Configured | Tue Jul 17 14:30:28 CEST 2018 | N/A                           | N/A                           |      |
| 476                           | Configured | Thu Jul 26 14:56:04 CEST 2018 | N/A                           | N/A                           |      |
| 479                           | Finished   | Sat Jul 28 12:43:47 CEST 2018 | Fri Aug 03 09:14:01 CEST 2018 | Fri Aug 03 09:42:37 CEST 2018 |      |
| 507                           | Failed     | Wed Aug 01 13:30:57 CEST 2018 | Thu Aug 02 14:54:54 CEST 2018 | Thu Aug 02 14:55:00 CEST 2018 |      |
| 508                           | Finished   | Wed Aug 01 14:06:04 CEST 2018 | Tue Aug 07 17:29:26 CEST 2018 | Tue Aug 07 18:54:35 CEST 2018 | Done |
| 542                           | Finished   | Wed Aug 08 09:52:51 CEST 2018 | Wed Aug 08 09:52:07 CEST 2018 | Wed Aug 08 10:22:07 CEST 2018 |      |
| 543                           | Running    | Wed Aug 08 10:25:23 CEST 2018 | Wed Aug 08 10:26:53 CEST 2018 | N/A                           |      |

(a)

| Progress   SnakeSnake output   Other output   job directories   Data upload |         |         |         |         |         |         |         |         |         |         |  |
|-----------------------------------------------------------------------------|---------|---------|---------|---------|---------|---------|---------|---------|---------|---------|--|
| Task name                                                                   | 1       | 2       | 3       | 4       | 5       | 6       | 7       | 8       | 9       | 10      |  |
| Define dataset                                                              | Done    |         |         |         |         |         |         |         |         |         |  |
| Define hdfs dataset                                                         | Done    |         |         |         |         |         |         |         |         |         |  |
| Resume to hdfs                                                              | Done    | Running |  |
| Detection and registrati...                                                 | Done    | Running |  |
| Merge and                                                                   | Done    | Running |  |
| Time lapse registration                                                     | Done    | Running |  |
| Average fusion                                                              | Done    | Running |  |
| Define output                                                               | Unknown |  |
| Define hdfs output                                                          | Unknown |  |
| Resume output to hdfs                                                       | Unknown |  |
| Done                                                                        | Done    |         |         |         |         |         |         |         |         |         |  |
|                                                                             |         |         |         |         |         |         |         |         |         |         |  |
|                                                                             |         |         |         |         |         |         |         |         |         |         |  |
|                                                                             |         |         |         |         |         |         |         |         |         |         |  |
|                                                                             |         |         |         |         |         |         |         |         |         |         |  |

Error

Unknown

Running

Done

Scheduled

(b)
