# Supplementary figures and images for: SPIM workflow manager for HPC
Source: Oxford University Press journal article supplement (doi:10.1093/bioinformatics/btz140), 2019-02-22

HPC Cluster

Local computer

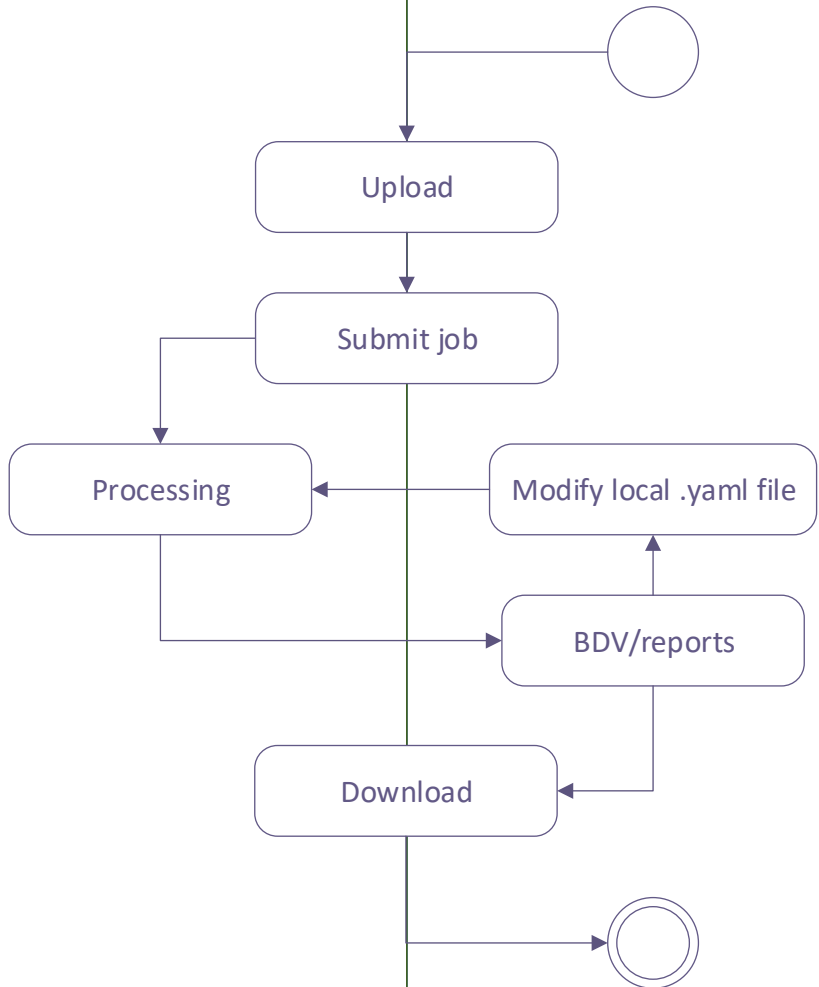

Supplement: bioinformatics_35_19_3875_s2.zip [file bioinformatics_35_19_3875_s2.zip]

HPC Cluster

Local computer

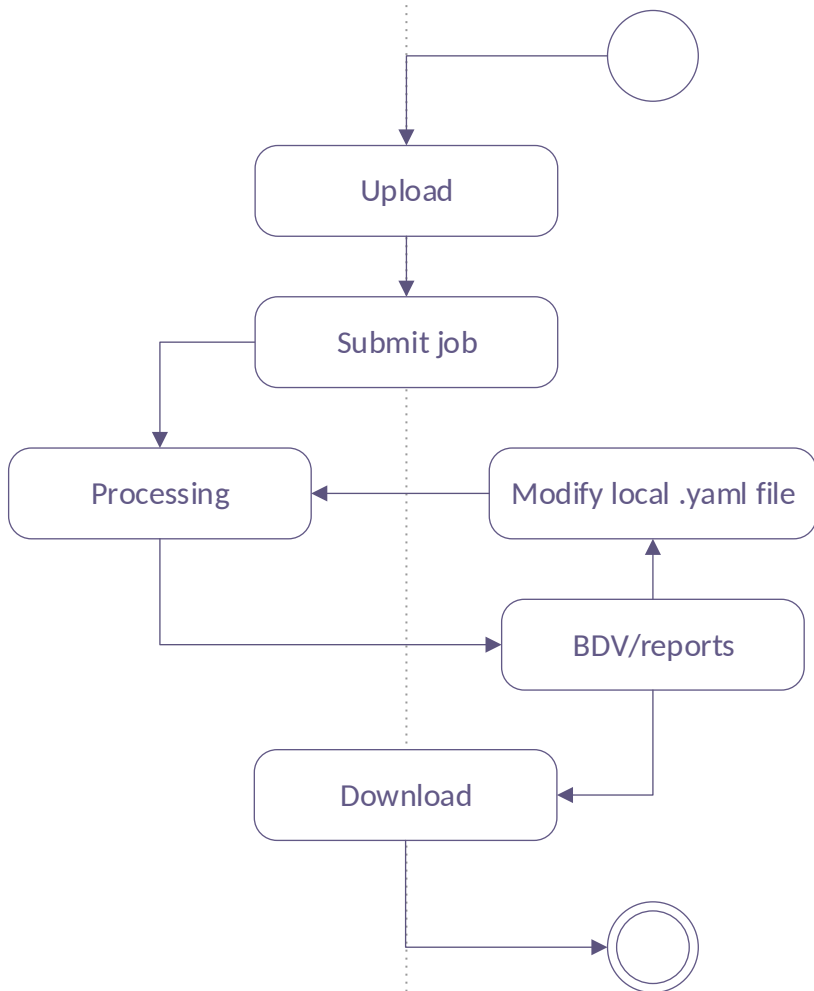

Supplement: bioinformatics_35_19_3875_s2.zip [file bioinformatics_35_19_3875_s2.zip]

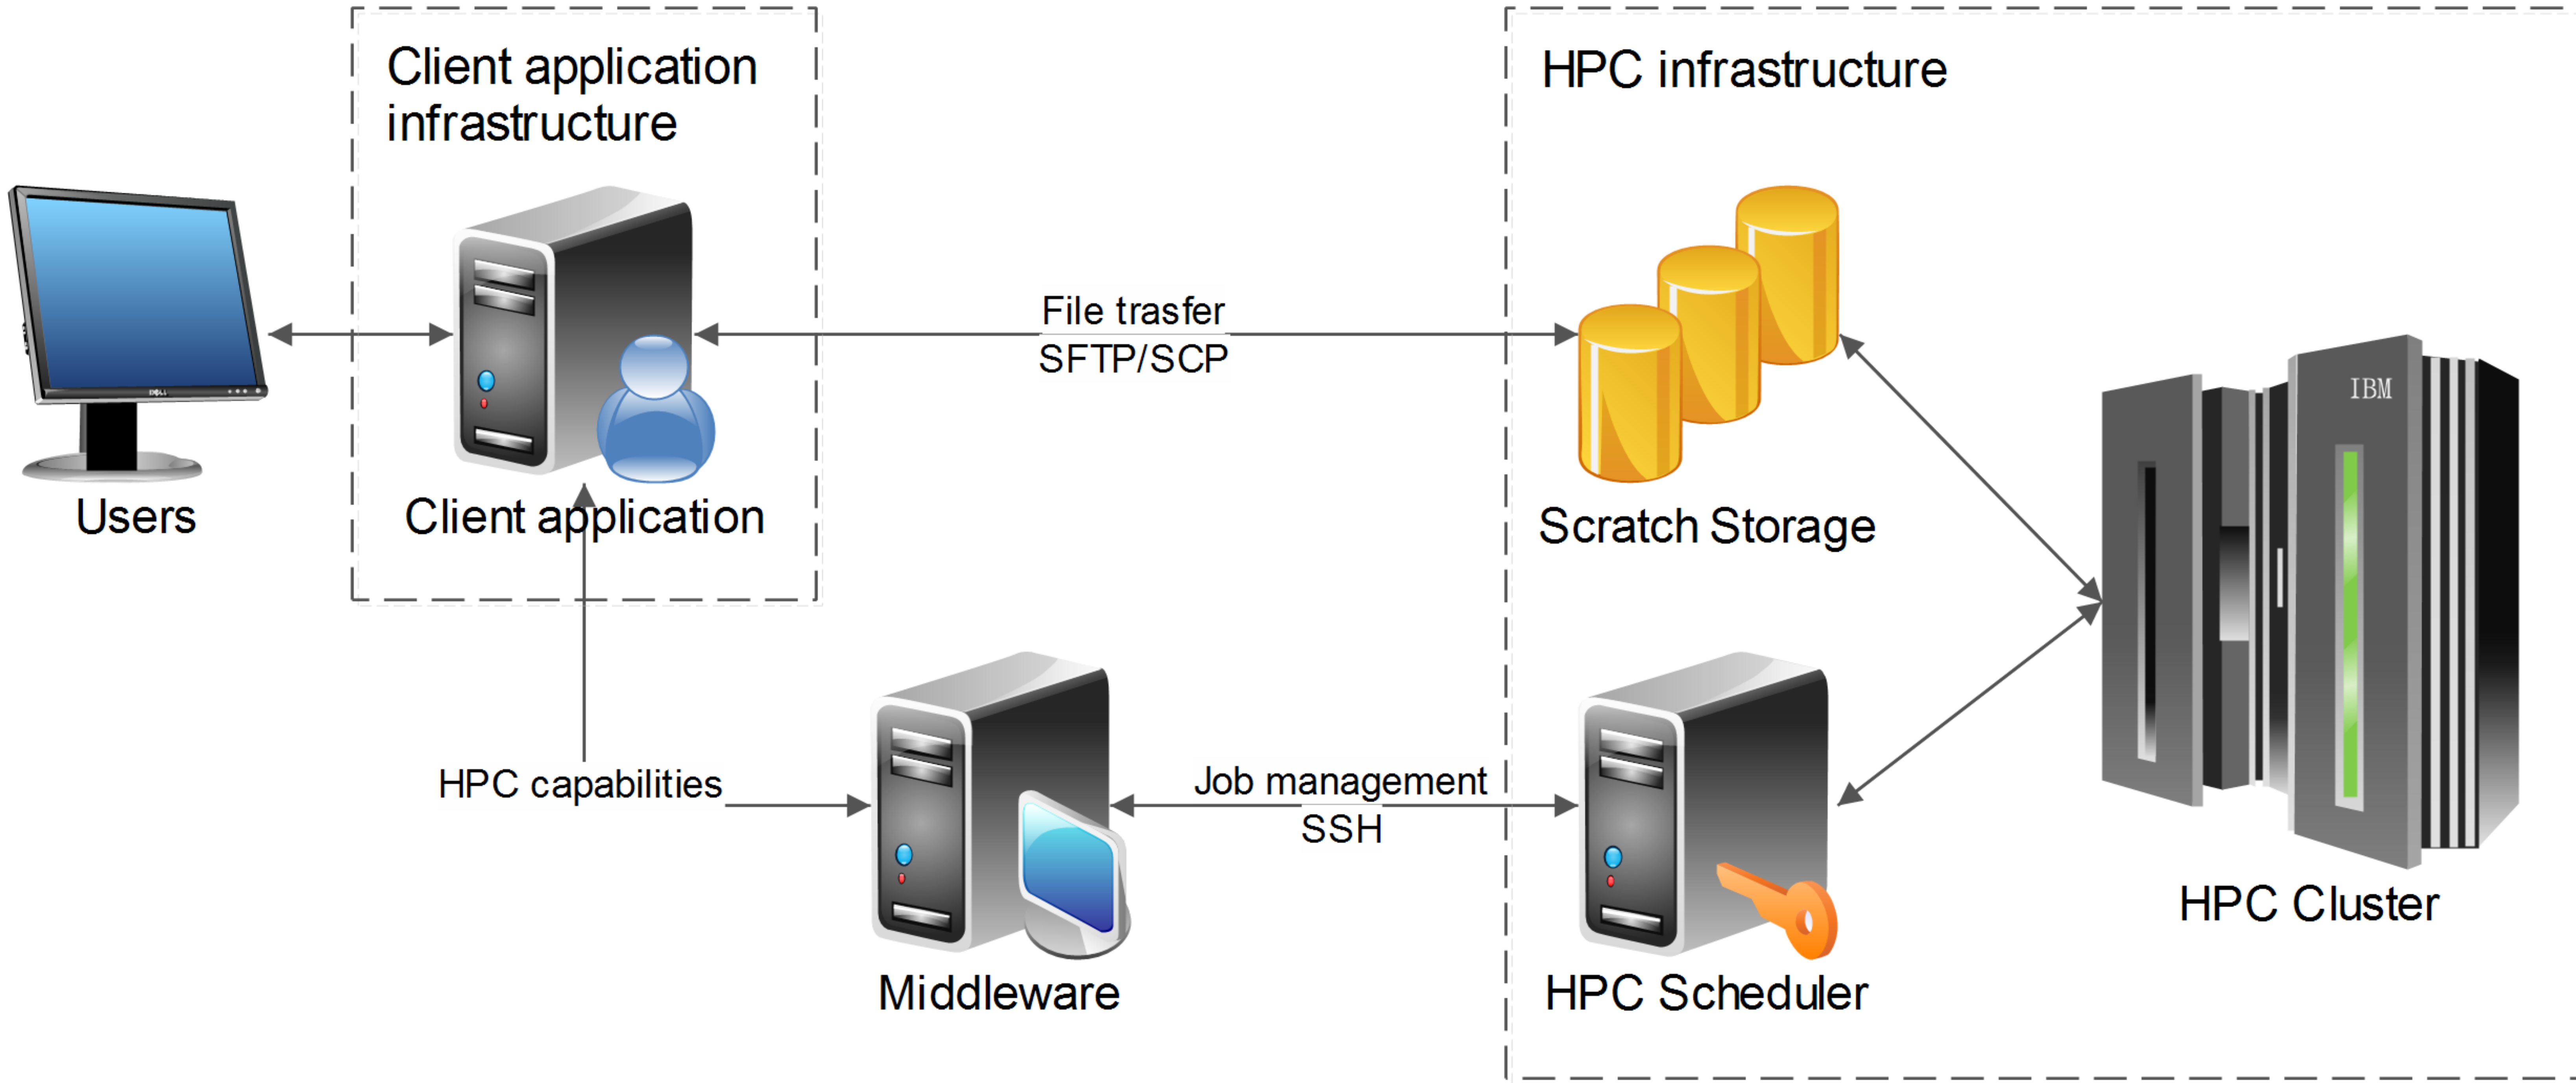

Supplement: bioinformatics_35_19_3875_s2.zip [file bioinformatics_35_19_3875_s2.zip]

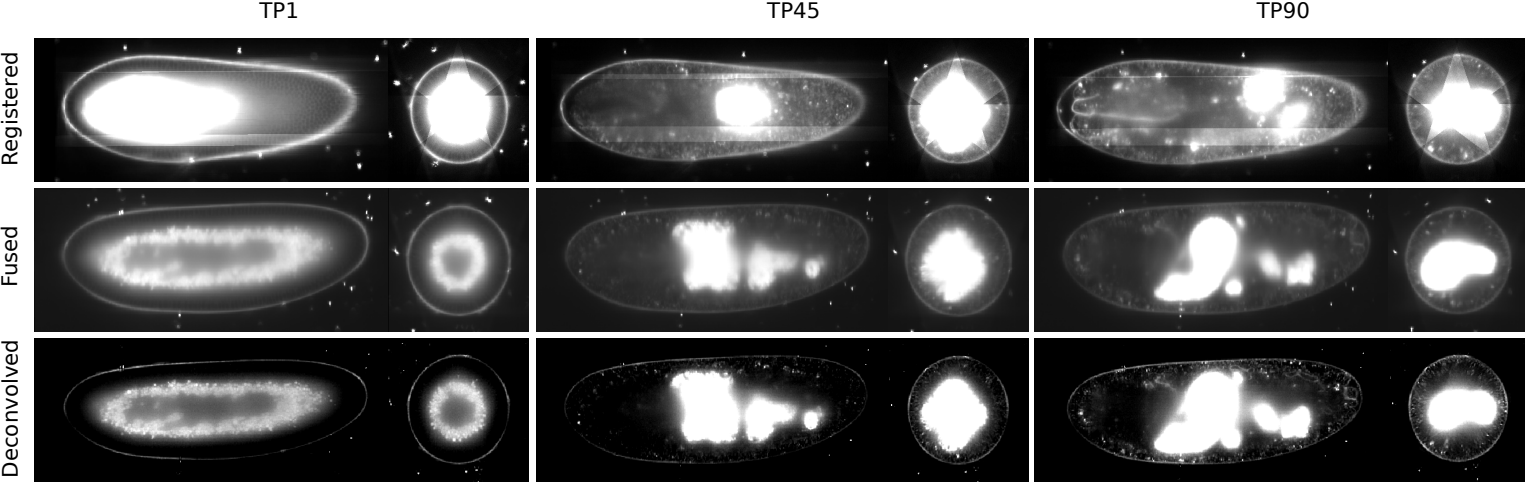

Supplement: bioinformatics_35_19_3875_s2.zip [file bioinformatics_35_19_3875_s2.zip]

TP1

TP45

TP90

Registered

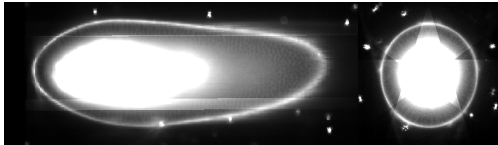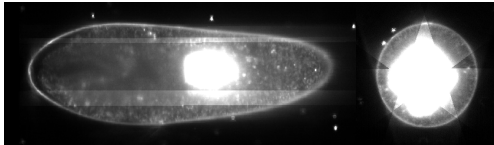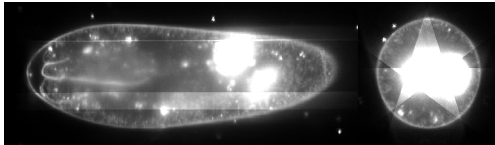

Fused

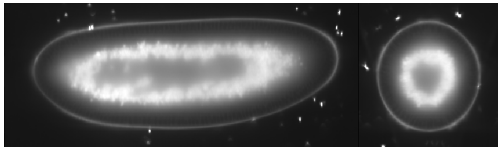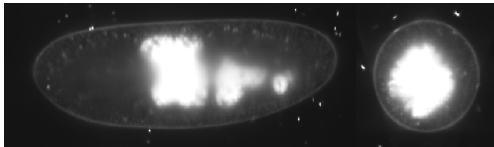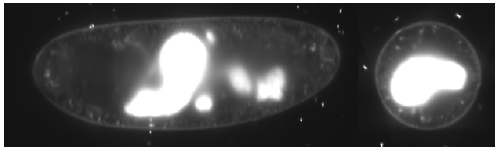

Supplement: bioinformatics_35_19_3875_s2.zip [file bioinformatics_35_19_3875_s2.zip]
